# Supplementary material for: Transglutaminase-Induced Polymerization of Pea and Chickpea Protein to Enhance Functionality
Source: MDPI journal article supplement (doi:10.3390/gels10010011), 2023-12-22
Supplement: s1 [file s1]

# Transglutaminase-Induced Polymerization of Pea and Chick-pea Protein to Enhance Functionality

Brigitta P Yaputri<sup>a</sup>, Samira Feyzi<sup>a</sup> and Baraem P Ismail<sup>a\*</sup>

<sup>a</sup>Food Science and Nutrition Department, University of Minnesota, 1334 Eckles Ave, Saint Paul, Minnesota 55108, USA

\*Correspondence: Email: bismailm@umn.edu

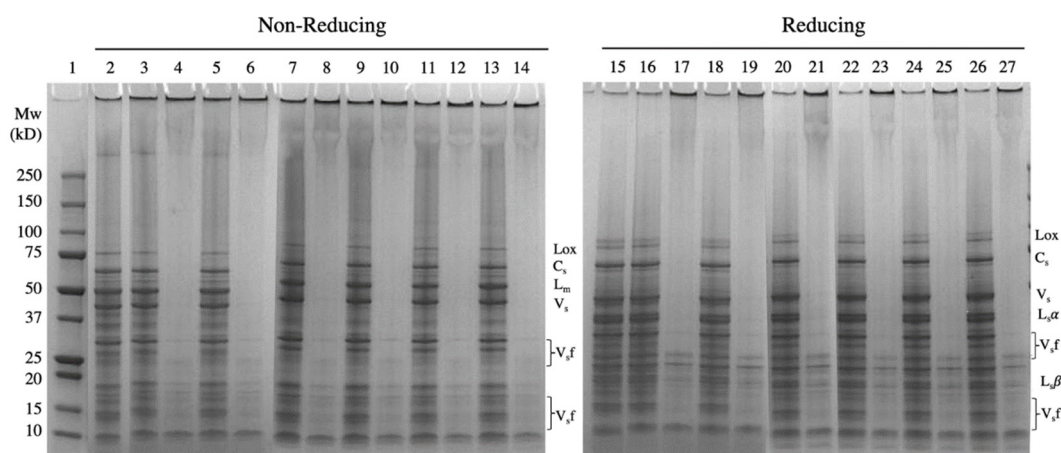

**Figure S1.** SDS-PAGE gel protein profile visualization of PPI upon TG treatment (C = 0 nkat/mL enzyme and E = 67 nkat/mL enzyme) for different times under non-reducing and reducing conditions. Lane 1: Molecular weight (MW) marker; lanes 2,15: PPI; lanes 3-4, 16-17: C and E 5 min; lanes 5-6, 18-19: C and E 10 min, lanes 7-8, 20-21: C and E 15 min; lanes 9-10, 22-23: C and E 30 min; lanes 11-12, 24-25: C and E 45 min; lanes 13-14, 26-27: C and E 60 min. Lox: lipoxxygenase; Cs: convicilin subunits; Lm: legumin monomer; Vs: vicilin subunits; Lsα: legumin acidic subunits, Lsβ: legumin basic subunits; Vsf: vicilin subunit fractions due to post-translational cleavages.

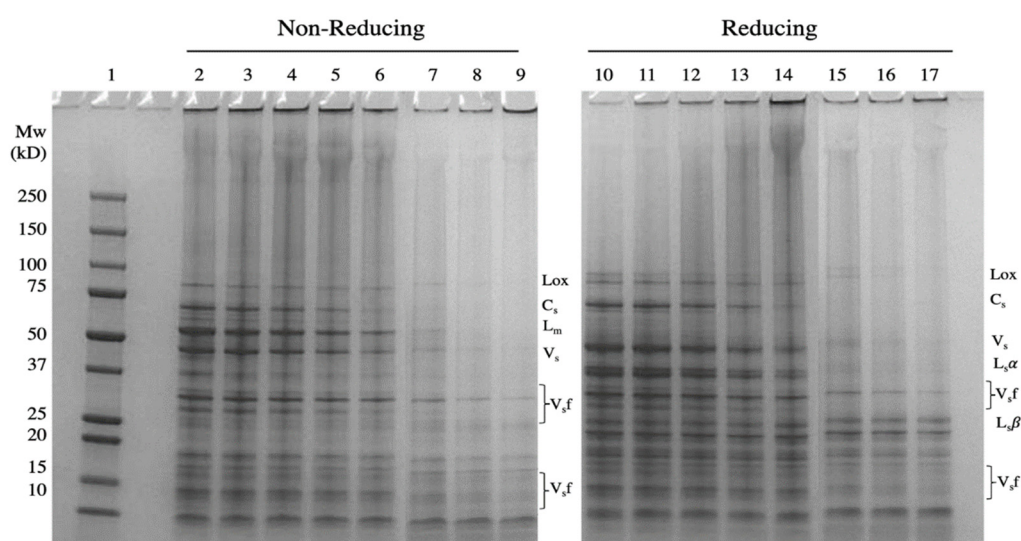

**Figure S2.** SDS-PAGE gel protein profile visualization of PPI treated with TG for 5 minutes at different enzyme concentrations under non-reducing (lanes 2-9) and reducing conditions (lanes 10-17). Lane 1: Molecular weight (MW) marker; lanes 2,10: PPI; lanes 3,11: 0 nkat/mL enzyme; lanes 4,12: 0.8 nkat/mL enzyme; lanes 5,13: 1.7 nkat/mL enzyme; lanes 6,14: 3.3 nkat/mL enzyme; lanes 7,15: 8.3

nkat/mL enzyme; lanes 8,16: 17 nkat/mL enzyme; lanes 9,17: 33 nkat/mL enzyme. Lox: lipoxigenase; Cs: convicilin subunits; L<sub>m</sub>: legumin monomer; V<sub>s</sub>: vicilin subunits; L<sub>s</sub>α: legumin acidic subunits, L<sub>s</sub>β: legumin basic subunits; V<sub>s</sub>f: vicilin subunit fractions due to post-translational cleavages.

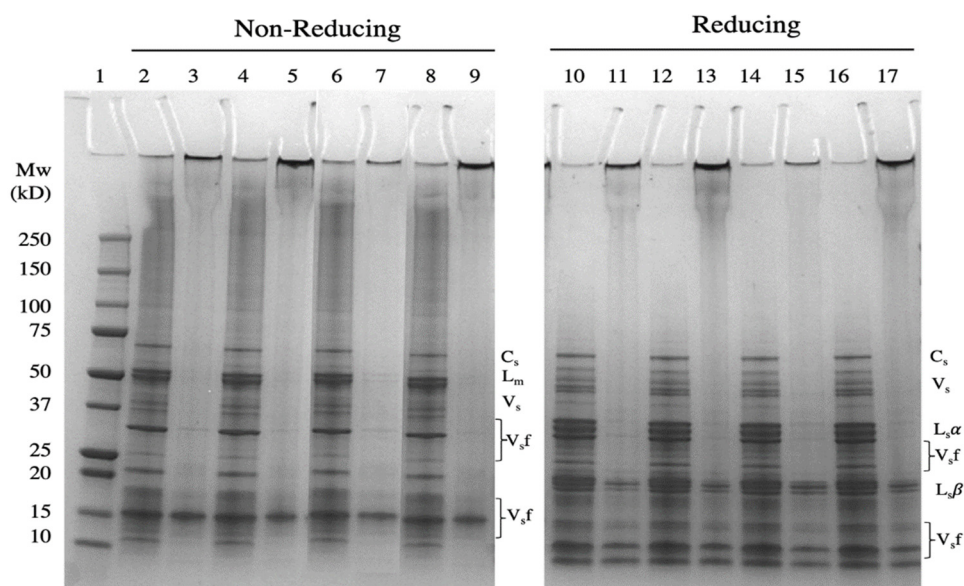

**Figure S3.** SDS-PAGE gel protein profile visualization of ChPI upon TG treatment (C = 0 nkat/mL enzyme and E = 67 nkat/mL enzyme) for different times under non-reducing (lanes 2-9) and reducing conditions (lanes 10-17). The enzyme activity of the enzyme stock is 3.3  $\mu$ kat/mL. Lane 1: Molecular weight (MW) marker; lanes 2,10: 15 min C; lanes 3,11: 15 min E; lanes 4,12: 30 min C; lanes 5,13: 30 min E; lanes 6,14: 45 min C; lanes 7,15: 45 min E; lanes 8,16: 60 min C; lanes 9,17: 60 min E. Lox: lipoxigenase; Cs: convicilin subunits; L<sub>m</sub>: legumin monomer; V<sub>s</sub>: vicilin subunits; L<sub>s</sub>α: legumin acidic subunits, L<sub>s</sub>β: legumin basic subunits; V<sub>s</sub>f: vicilin subunit fractions due to post-translational cleavages.

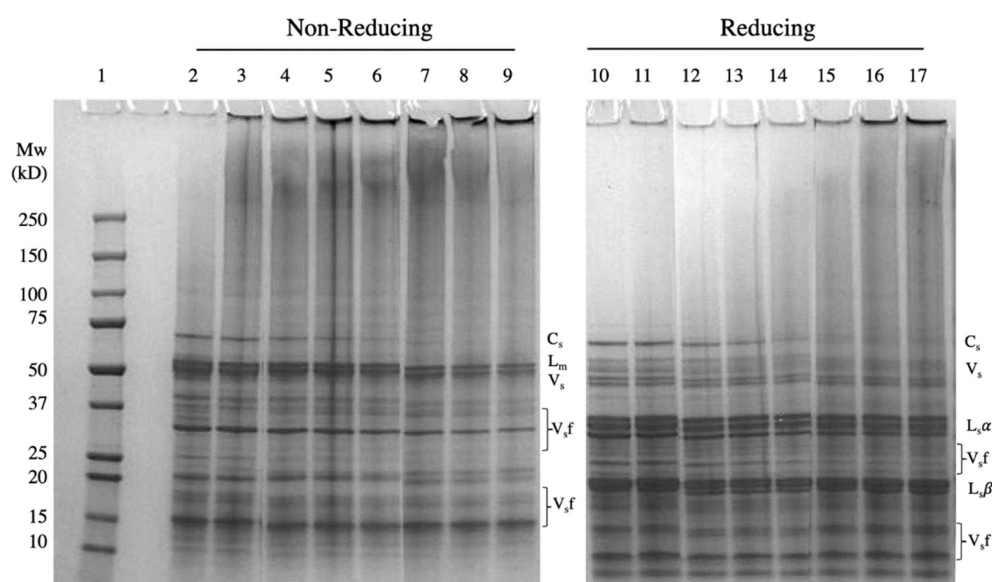

**Figure S4.** SDS-PAGE gel protein profile visualization of ChPI treated with TG for 5 minutes at different enzyme concentrations under non-reducing (lane 2-9) and reducing conditions (lane 10-17). The enzyme activity of the enzyme stock is 3.3  $\mu$ kat/mL. Lane 1: Molecular weight (MW) marker; Lanes 2,10: SU ChPI; Lanes 3,11: 0 nkat/mL enzyme; Lanes 4,12: 0.8 nkat/mL enzyme; Lanes 5,13: 1.7 nkat/mL enzyme; Lanes 6,14: 3.3 nkat/mL enzyme; Lanes 7,15: 5 nkat/mL enzyme; Lanes 8,16: 6.7 nkat/mL enzyme; Lanes 9,17: 8.3 nkat/mL enzyme. Lox: lipoxigenase; Cs: convicilin subunits; L<sub>m</sub>: legumin monomer; V<sub>s</sub>: vicilin subunits; L<sub>s</sub>α: legumin acidic subunits, L<sub>s</sub>β: legumin basic subunits; V<sub>s</sub>f: vicilin subunit fractions due to post-translational cleavages.

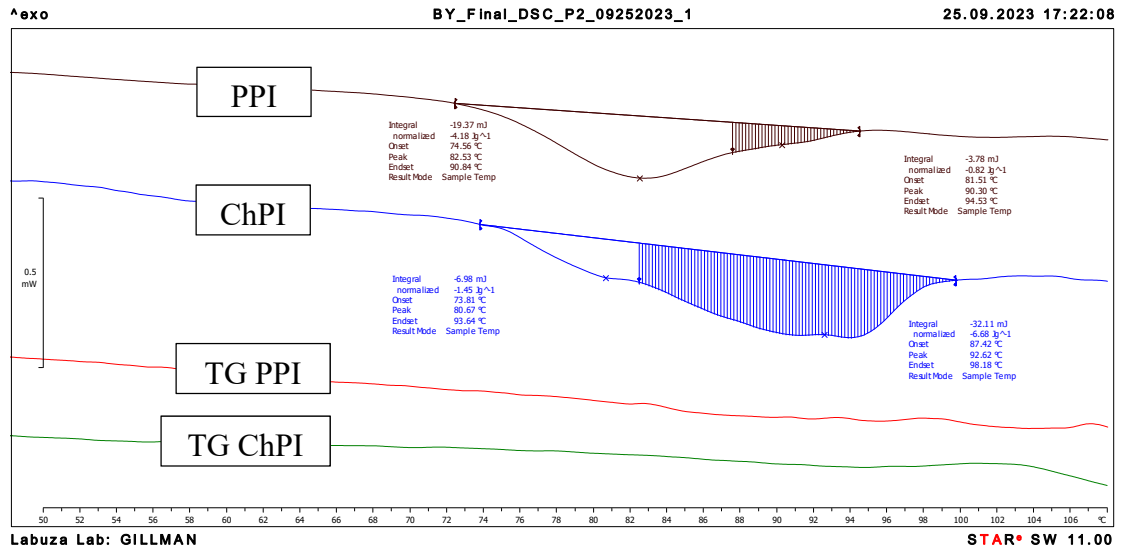

**Figure S5.** DSC graph of unmodified and TG-modified pea and chickpea protein isolates (PPI, ChPI, TG PPI, and TG ChPI).

**Table S1.** Gel strength of PPI and ChPI treated with different TG concentration for different incubation times.

| Sample  | Protein % (w/v) | Enzyme activity (nkat/mL) <sup>1</sup> | Treatment time | Gel strength (N)          |
|---------|-----------------|----------------------------------------|----------------|---------------------------|
| TG PPI  | 20%             | 0                                      | 0              | 13.2±0.16 <sup>bc</sup>   |
|         |                 | 67                                     | 0              | 6.76±0.17 <sup>g</sup>    |
|         |                 | 0                                      | 60             | 10.3±0.20 <sup>ef</sup>   |
|         |                 | 67                                     | 45             | 6.80±0.21 <sup>g</sup>    |
|         |                 | 0                                      | 45             | 11.9±0.09 <sup>de</sup>   |
|         |                 | 67                                     | 30             | 10.5±0.51 <sup>ef</sup>   |
|         |                 | 0                                      | 30             | 13.4±0.18 <sup>bc</sup>   |
|         |                 | 67                                     | 15             | 9.16±0.05 <sup>f</sup>    |
|         |                 | 0                                      | 15             | 11.1±0.12 <sup>de</sup>   |
|         |                 | 3.3                                    | 5              | 16.5±0.59 <sup>a</sup>    |
|         |                 | 1.7                                    | 5              | 13.9±0.26 <sup>b</sup>    |
|         |                 | 0.8                                    | 5              | 12.5±0.49 <sup>cd</sup>   |
| TG ChPI | 20%             | 0                                      | 0              | 9.81±0.09 <sup>f</sup>    |
|         |                 | 0                                      | 0              | 19.1±0.50 <sup>B</sup>    |
|         |                 | 67                                     | 0              | 23.0±0.73 <sup>A</sup>    |
|         |                 | 0                                      | 60             | 11.8±0.16 <sup>CD</sup>   |
|         |                 | 67                                     | 45             | 9.41±0.31 <sup>E</sup>    |
|         |                 | 0                                      | 45             | 10.9±0.25 <sup>DE</sup>   |
|         |                 | 67                                     | 30             | 19.8±0.62 <sup>B</sup>    |
|         |                 | 0                                      | 30             | 12.0±0.32 <sup>C</sup>    |
|         |                 | 67                                     | 15             | 5.17±0.87 <sup>F</sup>    |
|         |                 | 0                                      | 15             | 10.6±0.21 <sup>DE</sup>   |
|         | 15%             | 0                                      |                | 3.88 ± 0.03 <sup>β</sup>  |
|         |                 | 8.3                                    |                | 4.97 ± 0.10 <sup>αβ</sup> |
|         |                 | 6.7                                    |                | 5.83 ± 0.32 <sup>αβ</sup> |
|         |                 | 5.0                                    | 5              | 6.78 ± 0.28 <sup>α</sup>  |
|         |                 | 3.3                                    | 5              | 6.33 ± 0.35 <sup>α</sup>  |
|         |                 | 1.7                                    | 5              | 5.96 ± 0.21 <sup>α</sup>  |
|         |                 | 0.8                                    | 5              | 5.44 ± 0.20 <sup>αβ</sup> |

<sup>1</sup>nkat/mL refers to enzyme activity per sample volume; <sup>2</sup>Lowercase letters denote significant differences among the means (n=3, ± SE) of TG PPI gel strength measured at 20% (w/v); <sup>3</sup>Uppercase letters denote significant differences among the means (n=3, ± SE) of TG ChPI gel strength measured at 20% (w/v); <sup>3</sup>Greek letters denote significant differences

among the means ( $n=3$ ,  $\pm$  SE) of TG ChPI gel strength measured at 15% (w/v) according to the Tukey-Kramer multiple means comparison test ( $P < 0.05$ ).
